# Supplementary material for: Loss of MXRA8 Delays Mammary Tumor Development and Impairs Metastasis
Source: MDPI journal article supplement (doi:10.3390/ijms241813730), 2023-09-06
Supplement: s1 [file s1]

|              |      |                                                               |     |
|--------------|------|---------------------------------------------------------------|-----|
| 231MXRA8KO-O | 100  | CTGGGCCTGGGGCGCCGCTGTGGCTGGAGCCGTTGCCCGGAGAGCCCCggggggggCGGCT | 159 |
| MXRA8-201    | 1000 | CTGGGCCTGGGGCGCCGCTGTGGCTGGAGCCGTTGCCCGGAGAGCCCCGGGGGGGCGGCT  | 941 |
| 231MXRA8KO-O | 160  | CCGCGTGGGGTTCGGCGACCGTCAGGTGGAAGACGCGGCGTTCGTGCAGGCCACAGTAAT  | 219 |
| MXRA8-201    | 940  | CCGCGTGGGGTTCGGCGACCGTCAGGTGGAAGACGCGGCGTTCGTGCAGGCCACAGTAAT  | 881 |
| 231MXRA8KO-O | 220  | GGTGGTGCAGGTGGCAGGAGTAGGTGCCC-----GGCTCGATACGCA               | 261 |
| MXRA8-201    | 880  | GGTGGTGCAGGTGGCAGGAGTAGGTGCCCTCGTCGGCGACCTCCAGCGGCTCGATACGCA  | 821 |
| 231MXRA8KO-O | 262  | GTGAGAAGTCACCGCGCTCAAAGGCATCCGCGCCACAGCCACGCGGTCGCGCAGAAAAA   | 321 |
| MXRA8-201    | 820  | GTGAGAAGTCACCGCGCTCAAAGGCATCCGCGCCACAGCCACGCGGTCGCGCAGAAAAA   | 761 |
| 231MXRA8KO-V | 102  | CTGGGCCTGGGGCGCCGCTGTGGCTGGAGCCGTTGCCCGGAGAGCCCCGG-----       | 161 |
| MXRA8-201    | 1000 | CTGGGCCTGGGGCGCCGCTGTGGCTGGAGCCGTTGCCCGGAGAGCCCCGGGGGGGCGGCT  | 941 |
| 231MXRA8KO-V | 162  | -----                                                         | 221 |
| MXRA8-201    | 940  | CCGCGTGGGGTTCGGCGACCGTCAGGTGGAAGACGCGGCGTTCGTGCAGGCCACAGTAAT  | 881 |
| 231MXRA8KO-V | 223  | -----CGGCGACCTCCAGCGGCTCGATACGCA                              | 263 |
| MXRA8-201    | 880  | GGTGGTGCAGGTGGCAGGAGTAGGTGCCCTCGTCGGCGACCTCCAGCGGCTCGATACGCA  | 821 |
| 231MXRA8KO-V | 264  | GTGAGAAGTCACCGCGCTCAAAGGCATCCGCGCCACAGCCACGCGGTCGCGCAGAAAAA   | 323 |
| MXRA8-201    | 820  | GTGAGAAGTCACCGCGCTCAAAGGCATCCGCGCCACAGCCACGCGGTCGCGCAGAAAAA   | 761 |

Figure S1. Sequencing results from 231MXRA8KO-O and 231MXRA8KO-V cells aligned to MXRA8-201 sequence

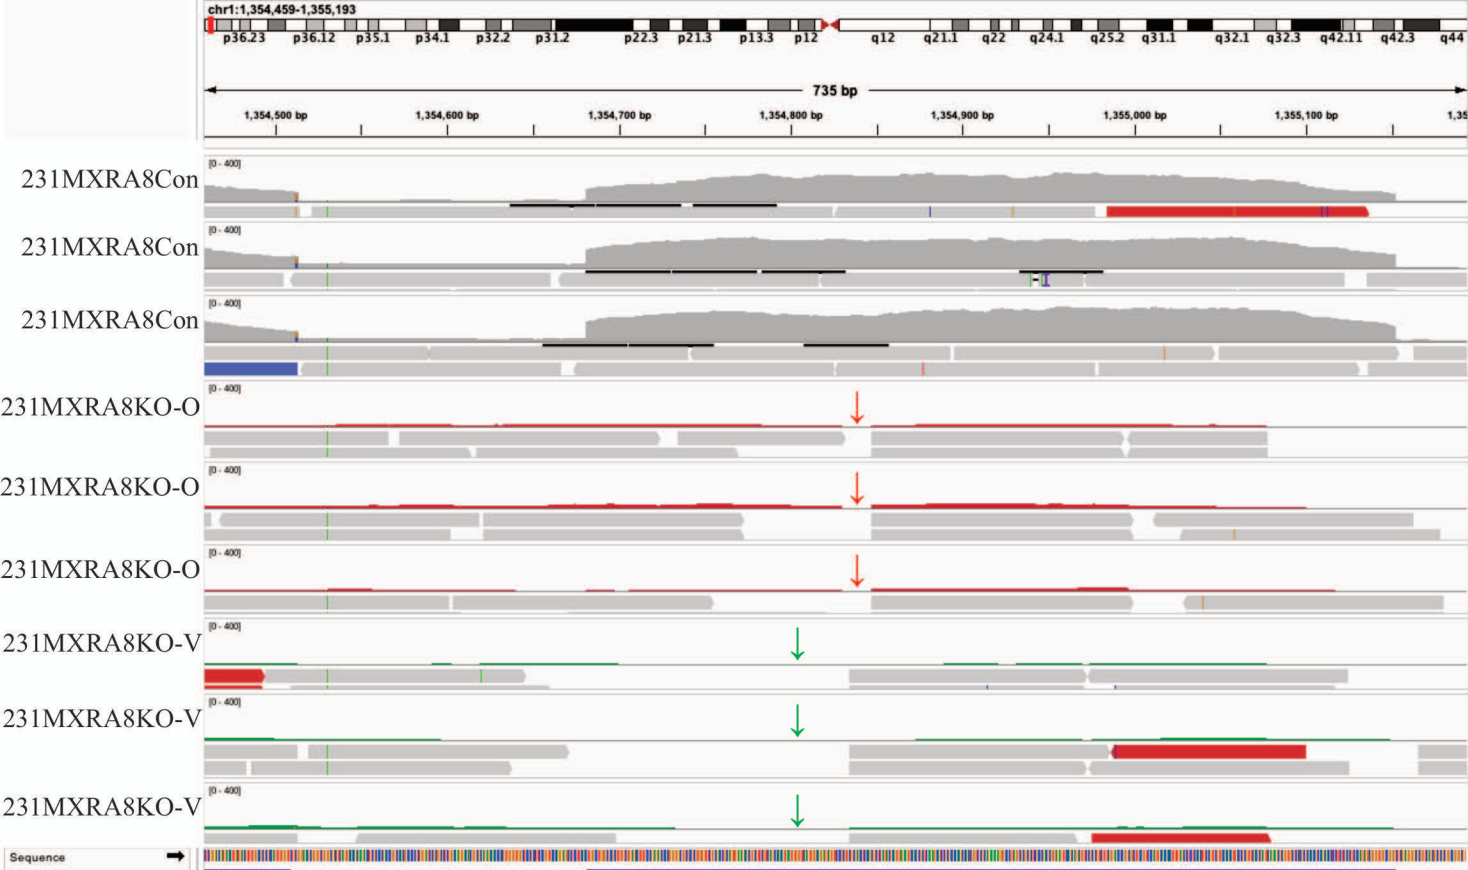

Figure S2. IGV image showing mapped reads from RNA sequencing data of 231MXRA8Con, 231MXRA8KO-O, and 231MXRA8KO-V cells grown in 2D culture. The red arrows indicate missing reads in 231MXRA8KO-O cells while the green arrows indicated missing reads in 231MXRA8KO-V cells.

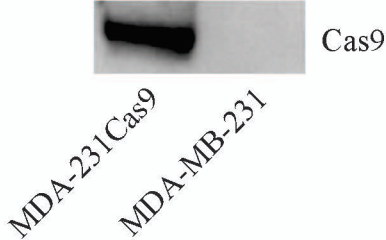

Figure S3. Western blot showing Cas9 protein in MDA-231Cas9 cells compared to parental MDA-MB-231 cells
